# Supplementary material for: miRNA Pattern in Hypoxic Microenvironment of Kidney Cancer—Role of PTEN
Source: MDPI journal article supplement (doi:10.3390/biom12050686), 2022-05-11

## Supplementary Materials

Commercially available RNA isolates were purchased from TaKaRa, San Jose, CA, USA.

2 independent vials of RNA isolates were used in each experiment.

Healthy (#cat 636529 #LOT 1405150A) – normal human kidney pooled from a 40-year-old Caucasian female, cause of death: sudden death

Tumor (cat 636632 #LOT 1102289A) – kidney renal cell carcinoma isolated from a 48-year-old male Caucasian.

Supplementary Figure S1

Results of sequencing - PTEN knockout clones

Renca wild-type cell line:

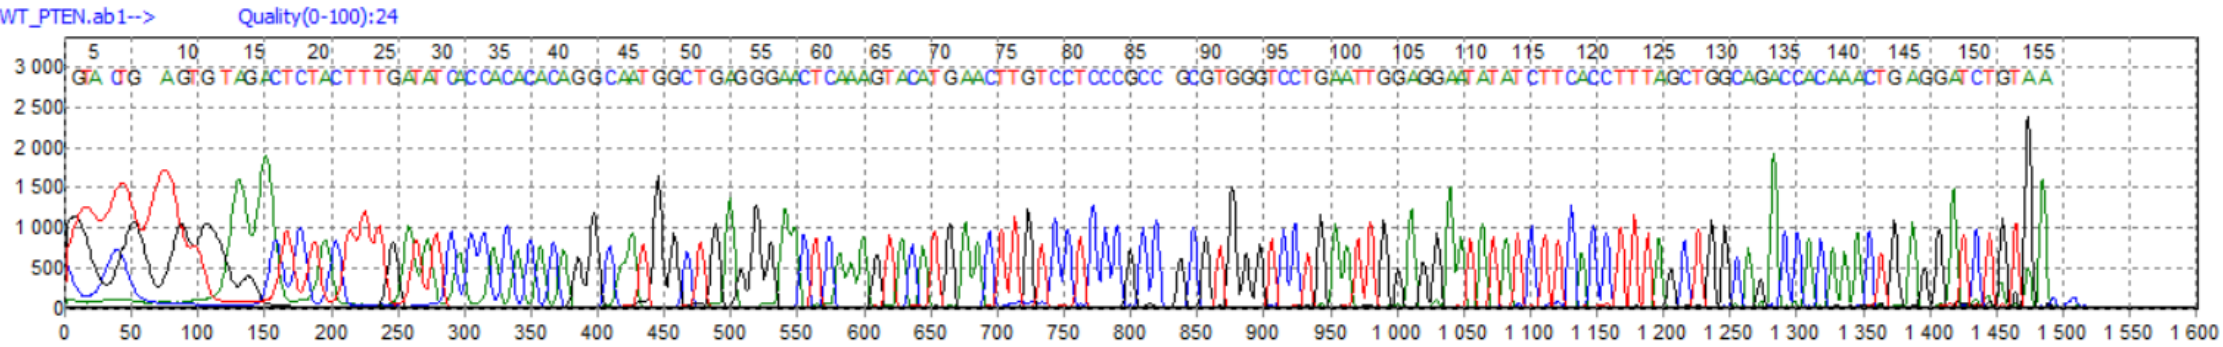

Renca pten/KO (clone 11G4\_PTEN):

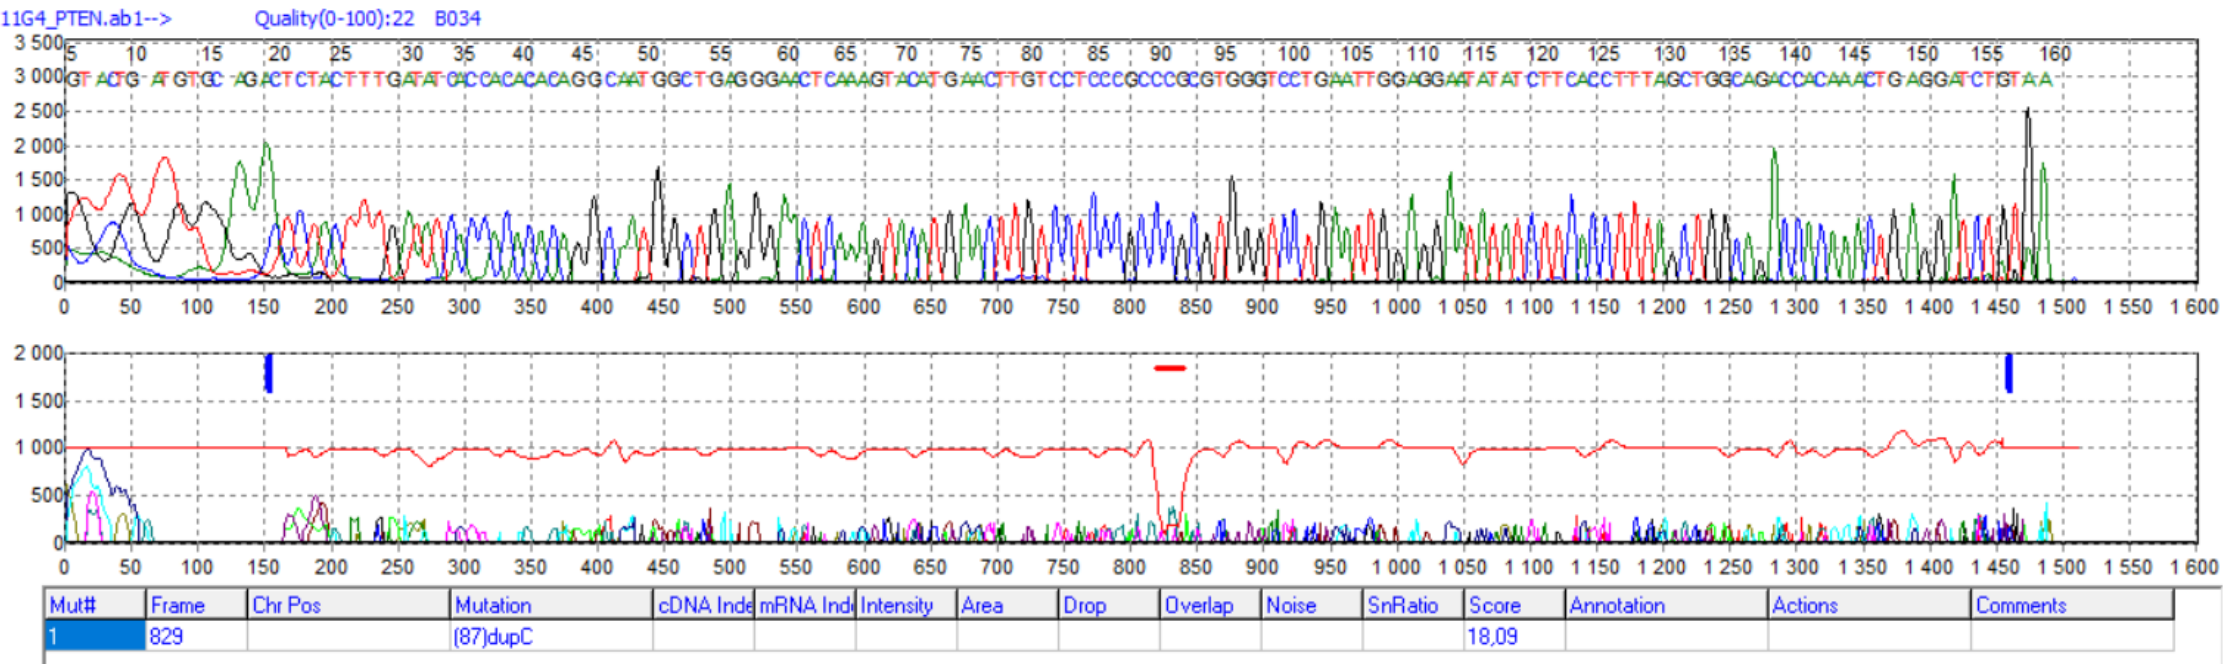

Renca pten/WT – negative control (clone B3B12\_PTEN):

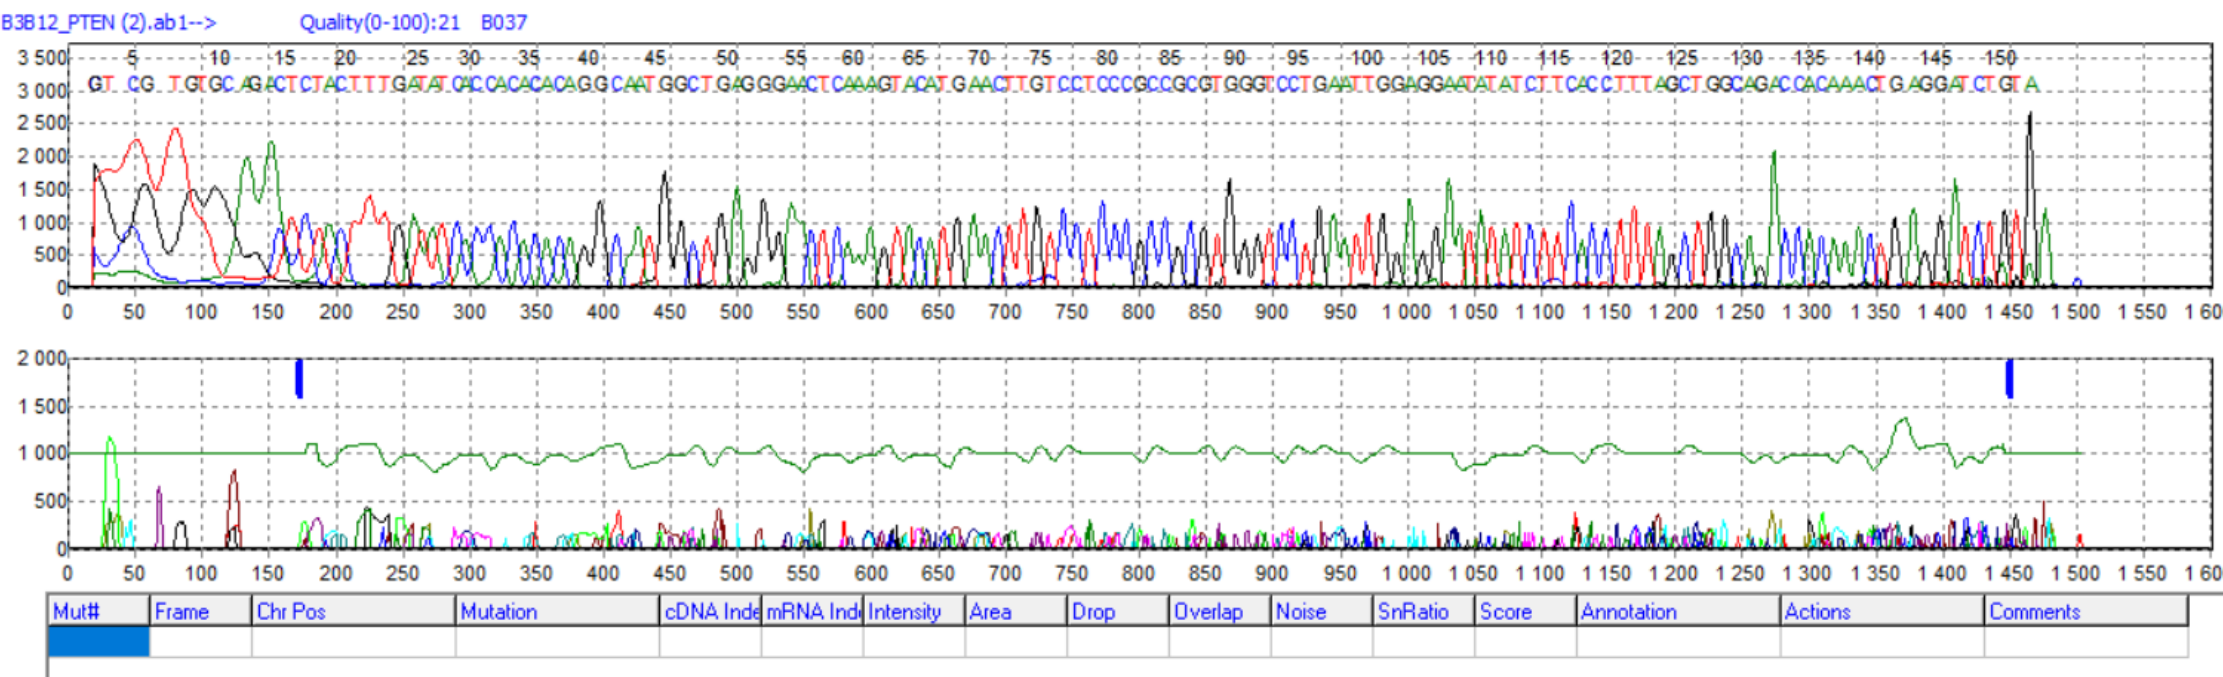



☒ Lock Sample File in View

| No. | Sample File       | Reference File | Dir | Gene | Exon | RF | Start | End   | Size | Qualit | Mut# | Mutation1 | Mutation2     |
|-----|-------------------|----------------|-----|------|------|----|-------|-------|------|--------|------|-----------|---------------|
| 2   | 11G4_PTEN.ab1     | WT_PTEN.ab1    | 1-R | Pten | 7    | 2  | 57840 | 57974 | 135  | 22     | 1    |           | 57905dupG\$18 |
| 3   | B3B12_PTEN (2).ab | WT_PTEN.ab1    | 1-R | Pten | 7    | 2  | 57841 | 57973 | 133  | 21     | 0    |           |               |
| 4   | sequenc_R11_Synth | WT_PTEN.ab1    | 1-R | Pten | 7    | 2  | 57840 | 57974 | 135  | 82     | 0    |           |               |
| 4   |                   |                |     |      |      |    |       |       | 466  | 36     | 0,50 | 33,3%     | 33,3%         |

# Supplementary Figure S2

Size of nanoparticles isolated with the ExoQuick Buffer from Renca cells conditioned medium  
A) normoxic B) hypoxic, measured using Zeta Viewer Nanoparticle Analyzer C) level of  
exosomal marker TSG101 in samples of isolated nanoparticles

A Normoxia

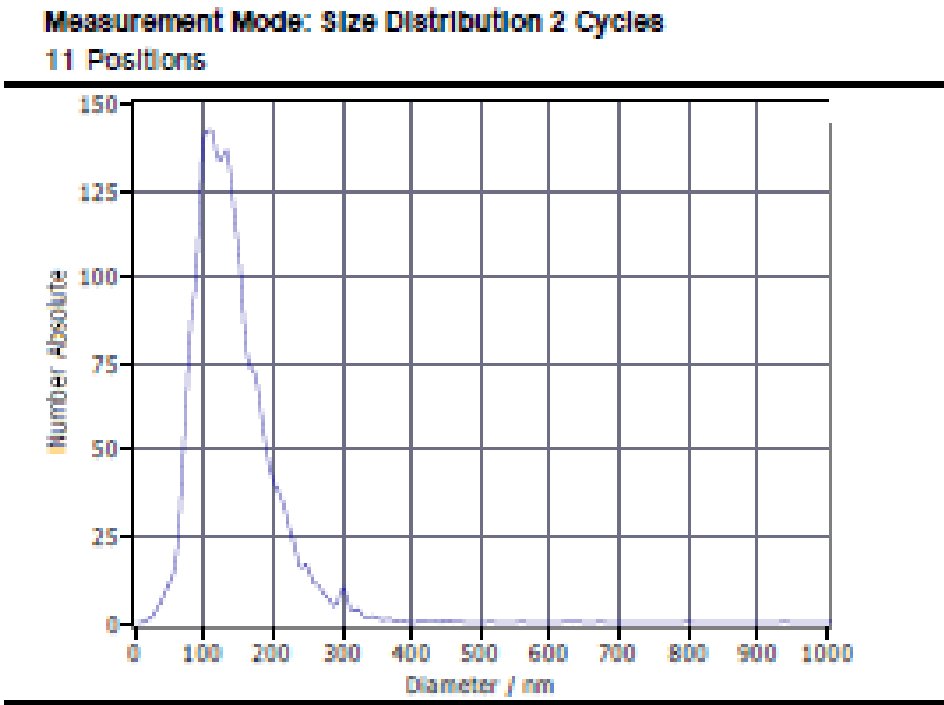

B Hypoxia

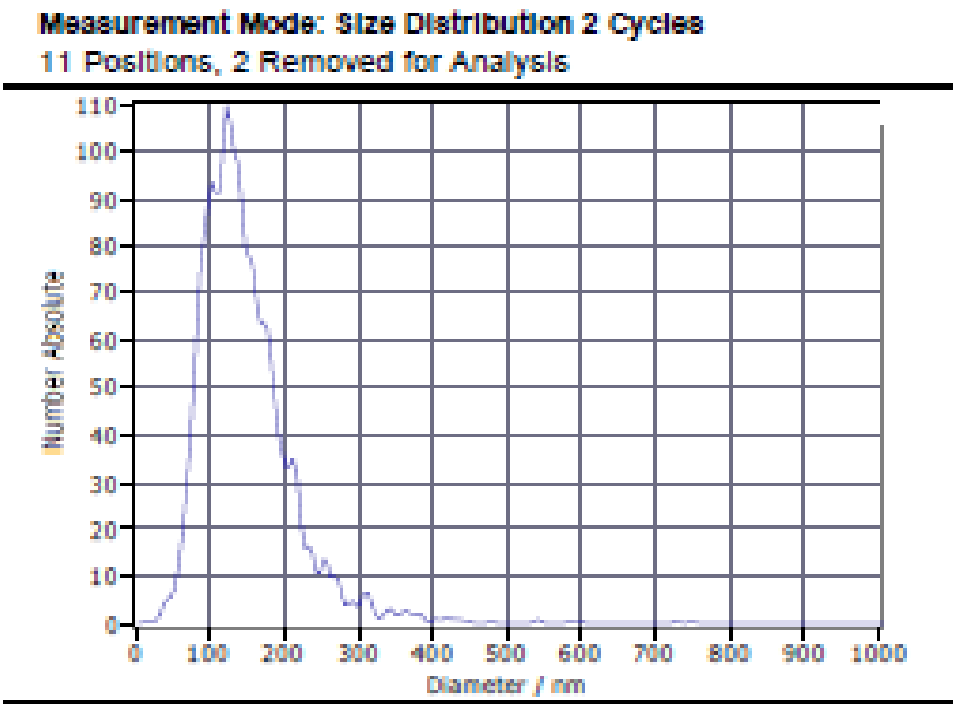

C Biological repetition: 1 2 3

Normoxia Hypoxia Normoxia Hypoxia Normoxia Hypoxia

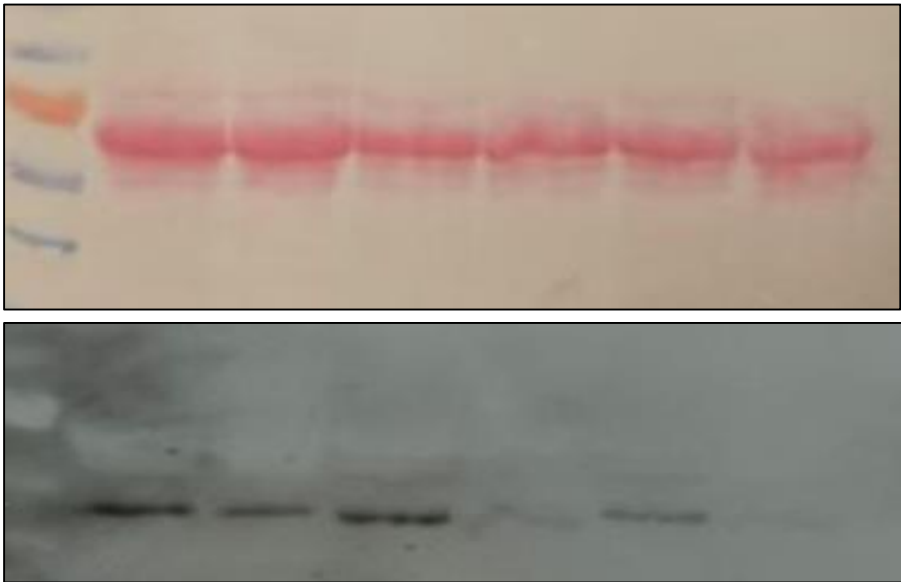

Ponceau

TSG101

Supplementary Figure S3

Volcano plots of DEmiRNA between Renca pten/WT and pten/KO cell in A) normoxic B) hypoxic conditions. Listed miRNAs significantly changed in pten/KO in vivo samples compared to pten/WT

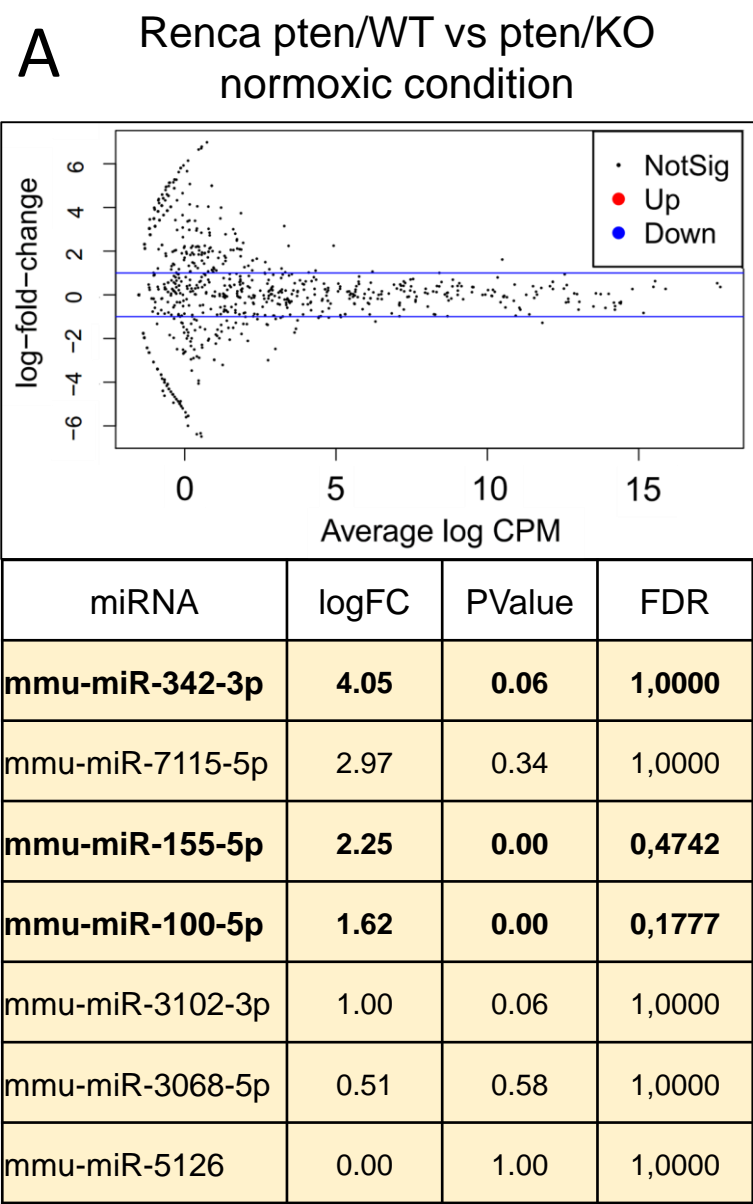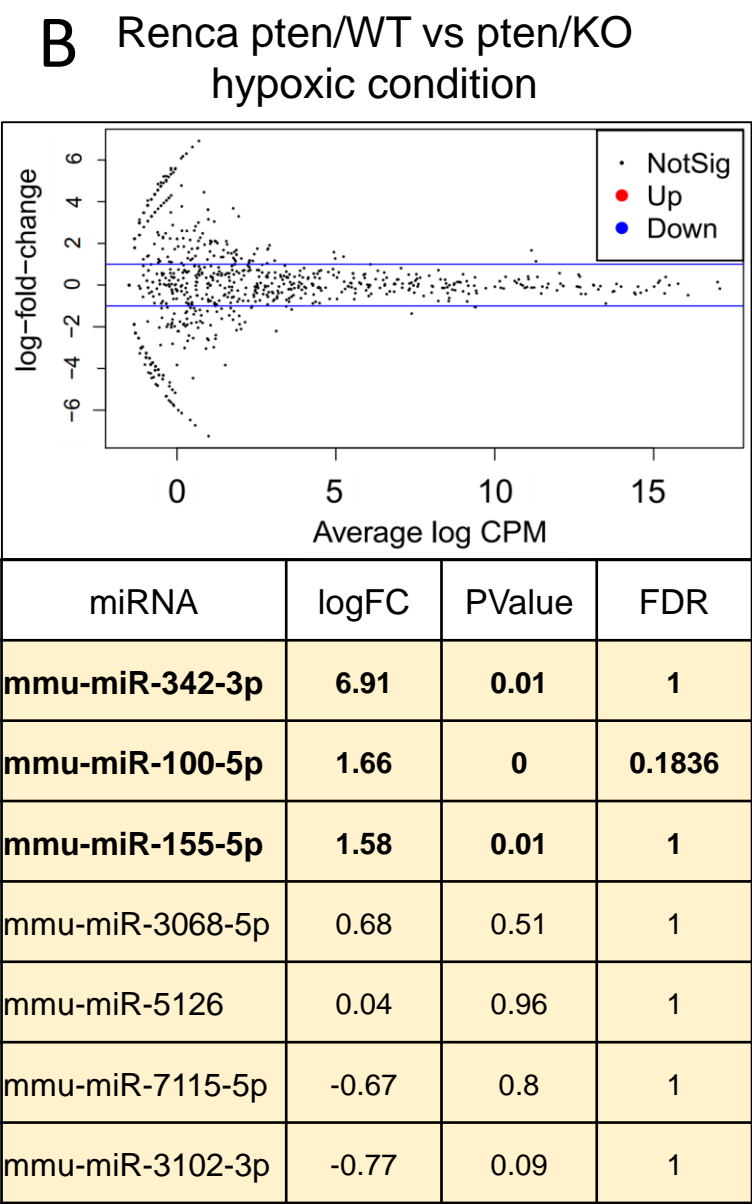

Supplement: s1 [file s1]
